# Supplementary material for: Outcomes of major trauma among patients with chronic kidney disease and receiving dialysis in Nova Scotia: a retrospective analysis
Source: HighWire-hosted journal article supplement (doi:10.1136/tsaco-2020-000672), 2021-04-01
Supplement: tsaco-2020-000672supp001_data_supplement.pdf [file tsaco-2020-000672supp001_data_supplement.pdf]

**Supplementary Digital Content Table 1:** Criteria for Trauma Team Activation at the QEII Health Sciences Centre (Any 1 of each item).

**Brief Summary:** A description of the criteria for activation of the Trauma Team at the QEII Health Science Centre in Halifax. The Trauma Team is activated for major trauma patients who meet at least one of the criteria listed.

1. Loss of vital signs en route to emergency department
2. Systolic blood pressure <90mmHg with evidence of hypoperfusion
3. Ventilatory compromise (respiratory rate <10 or >30 breaths per minute)
4. Glasgow Coma Scale <12 with evidence of torso or extremity trauma
5. Pregnant patient (>20 weeks gestation) with fetal heart rate <120 beats per minute or >160 beats per minute
6. Amputation proximal to elbows/knees
7. Two or more proximal long bone fractures
8. Suspected spinal cord injury
9. Severe maxillofacial injury with potential airway compromise
10. Burns involving >15% of total body surface area
11. Pregnant patient (>20 weeks gestation) with penetrating injury or significant blunt injury
12. Gunshot wound proximal to elbow/knee
13. Significant penetrating wound to head, neck, chest, abdomen, or groin
14. Ejection from vehicle
15. Pedestrian thrown/hit/run over by car
16. Fall from height >6 m
17. Simultaneous arrival of 3 or more multi-trauma patients
18. If emergency physician believes that trauma team activation is necessary
